# Supplementary material for: A Cyber-Physical Data Collection System Integrating Remote Sensing and Wireless Sensor Networks for Coffee Leaf Rust Diagnosis
Source: MDPI journal article supplement (doi:10.3390/s21165474), 2021-08-13
Supplement: s1 [file s1]

**Table S1.** Morphological Matrix.

→ CONCEPT 1 → CONCEPT 2

| FUNCTION CARRIER                             |                                                                                                           |                                                                                                                         |                                                                                                                                  |                                                                                                                                                  |
|----------------------------------------------|-----------------------------------------------------------------------------------------------------------|-------------------------------------------------------------------------------------------------------------------------|----------------------------------------------------------------------------------------------------------------------------------|--------------------------------------------------------------------------------------------------------------------------------------------------|
| Function                                     | PROPOSAL 1                                                                                                | PROPOSAL 2                                                                                                              | PROPOSAL 3                                                                                                                       | PROPOSAL 4                                                                                                                                       |
| 1. Group coffee plants                       | <p>"Almacigo" group</p>  | <p>Coffee group with diverse ages</p>  | <p>Coffee group in production stage</p>        | <p>Coffee plants between "almacigo" and production stage</p>  |
| 2. Store organic matter                      | <p>Plant pots</p>        | <p>Plant bags</p>                      | <p>Crop beds</p>                               | <p>Regular crop disposal</p>                                  |
| 3. Store fertilizer and fungicide            | <p>Bottles</p>          | <p>Tanks</p>                          | <p>Spray</p>                                  |                                                                                                                                                  |
| 4. Transport H <sub>2</sub> O                | <p>Pumping</p>         | <p>Gravity from tank</p>             | <p>Normal pressure from aqueduct system</p>  |                                                                                                                                                  |
| 5. Transform electrical energy               | <p>DC motor</p>        | <p>Stepper motor</p>                 | <p>Servomotor</p>                            |                                                                                                                                                  |
| 6. Combine coffee plants with organic matter | <p>Regular crop</p>    | <p>Single plant care</p>             | <p>Raised garden beds</p>                    |                                                                                                                                                  |

|                                                             |                                                                                                                         |                                                                                                        |                                                                                                                |                                                                                                                               |
|-------------------------------------------------------------|-------------------------------------------------------------------------------------------------------------------------|--------------------------------------------------------------------------------------------------------|----------------------------------------------------------------------------------------------------------------|-------------------------------------------------------------------------------------------------------------------------------|
| 7. Distribute fertilizer and fungicide                      | Spray                                  | Pressurized knapsack  |                                                                                                                |                                                                                                                               |
| 8. Simulate rain with H <sub>2</sub> O                      | Holes in tubes                         | Sprinkler bottom-up   | Sprinkler top-down           |                                                                                                                               |
| 9. Divide coffee plants with organic matter                 | Wood, class IV penetration index = 9  | Acrylic              | Bricks and cement           | Plastic, polyethylene and polipropilene.  |
| 10. Inoculate Coffee Leaf Rust                              | In-vitro                             | Natural (wind)      | Rub with Coffee Leaf Rust  | Brush                                    |
| 11. Assemble inoculated and non-inoculated coffee plants    | One single piece divided             | Independent lots    | Pairs of lots              |                                                                                                                               |
| 12. Incorporate fungicide and fertilizer with coffee plants | Sprinkler                            | Spray               | Pressurized knapsack       | Holes in tubes                           |

|                                                                |                                                                                                                            |                                                                                                                 |                                                                                                                  |                                                                                                               |
|----------------------------------------------------------------|----------------------------------------------------------------------------------------------------------------------------|-----------------------------------------------------------------------------------------------------------------|------------------------------------------------------------------------------------------------------------------|---------------------------------------------------------------------------------------------------------------|
| 13. Perceive wind velocity                                     | Ultrasonic wind sensor<br>                | Dual wind sensor<br>           | GPRS weather station<br>       |                                                                                                               |
| 14. Perceive volumetric flow rate                              | Flow meter<br>                            | Pluviometer<br>                | Electromagnetic flow meter<br> |                                                                                                               |
| 15. Position multispectral camera                              | Stepper motor<br>                         | Servomotor<br>                 | Manual<br>                     |                                                                                                               |
| 16. Position RGB camera                                        | Movement by chains<br>                  | Curved rails<br>              | Endless screw<br>            | Small car positioning<br> |
| 17. Isolate each lot of coffee plants                          | Plastic curtains<br>                    | Fabric curtains<br>          | Blinds<br>                   |                                                                                                               |
| 18. Combine simulated rain with isolated lots of coffee plants | Holes in tubes raised from the lots<br> | Sprinkler above the lots<br> |                                                                                                                  |                                                                                                               |



|                                                                        |                                                                                                                        |                                                                                                                |                                                                                                                |                                                                                                       |
|------------------------------------------------------------------------|------------------------------------------------------------------------------------------------------------------------|----------------------------------------------------------------------------------------------------------------|----------------------------------------------------------------------------------------------------------------|-------------------------------------------------------------------------------------------------------|
| 19. Integrate expert info with isolated lots of coffee plants          | Remote monitoring<br>                 | Visual inspection<br>         |                                                                                                                |                                                                                                       |
| 20. Perceive pH in isolated lots of coffee plants                      | Type drainage<br>                     | Type soil<br>                 | Type general<br>             |                                                                                                       |
| 21. Perceive lux in isolated lots of coffee plants                     | Lux sensor<br>                       | Digital luminosity sensor<br> | LDR<br>                     |                                                                                                       |
| 22. Perceive humidity in isolated lots of coffee plants                | Soil moisture capacitive sensor<br> | DHT-33 (x2)<br>             | SHT-10 humidity sensor<br> | 5TE / DHT-33<br> |
| 23. Perceive temperature in isolated lots of coffee plants             | Type soil<br>                       | Thermometer<br>             | DHT-33 (x2)<br>            | 5TE / DHT-33<br> |
| 24. Perceive electrical conductivity in isolated lots of coffee plants | Conductivity electrode<br>          | 5TE<br>                     |                                                                                                                |                                                                                                       |

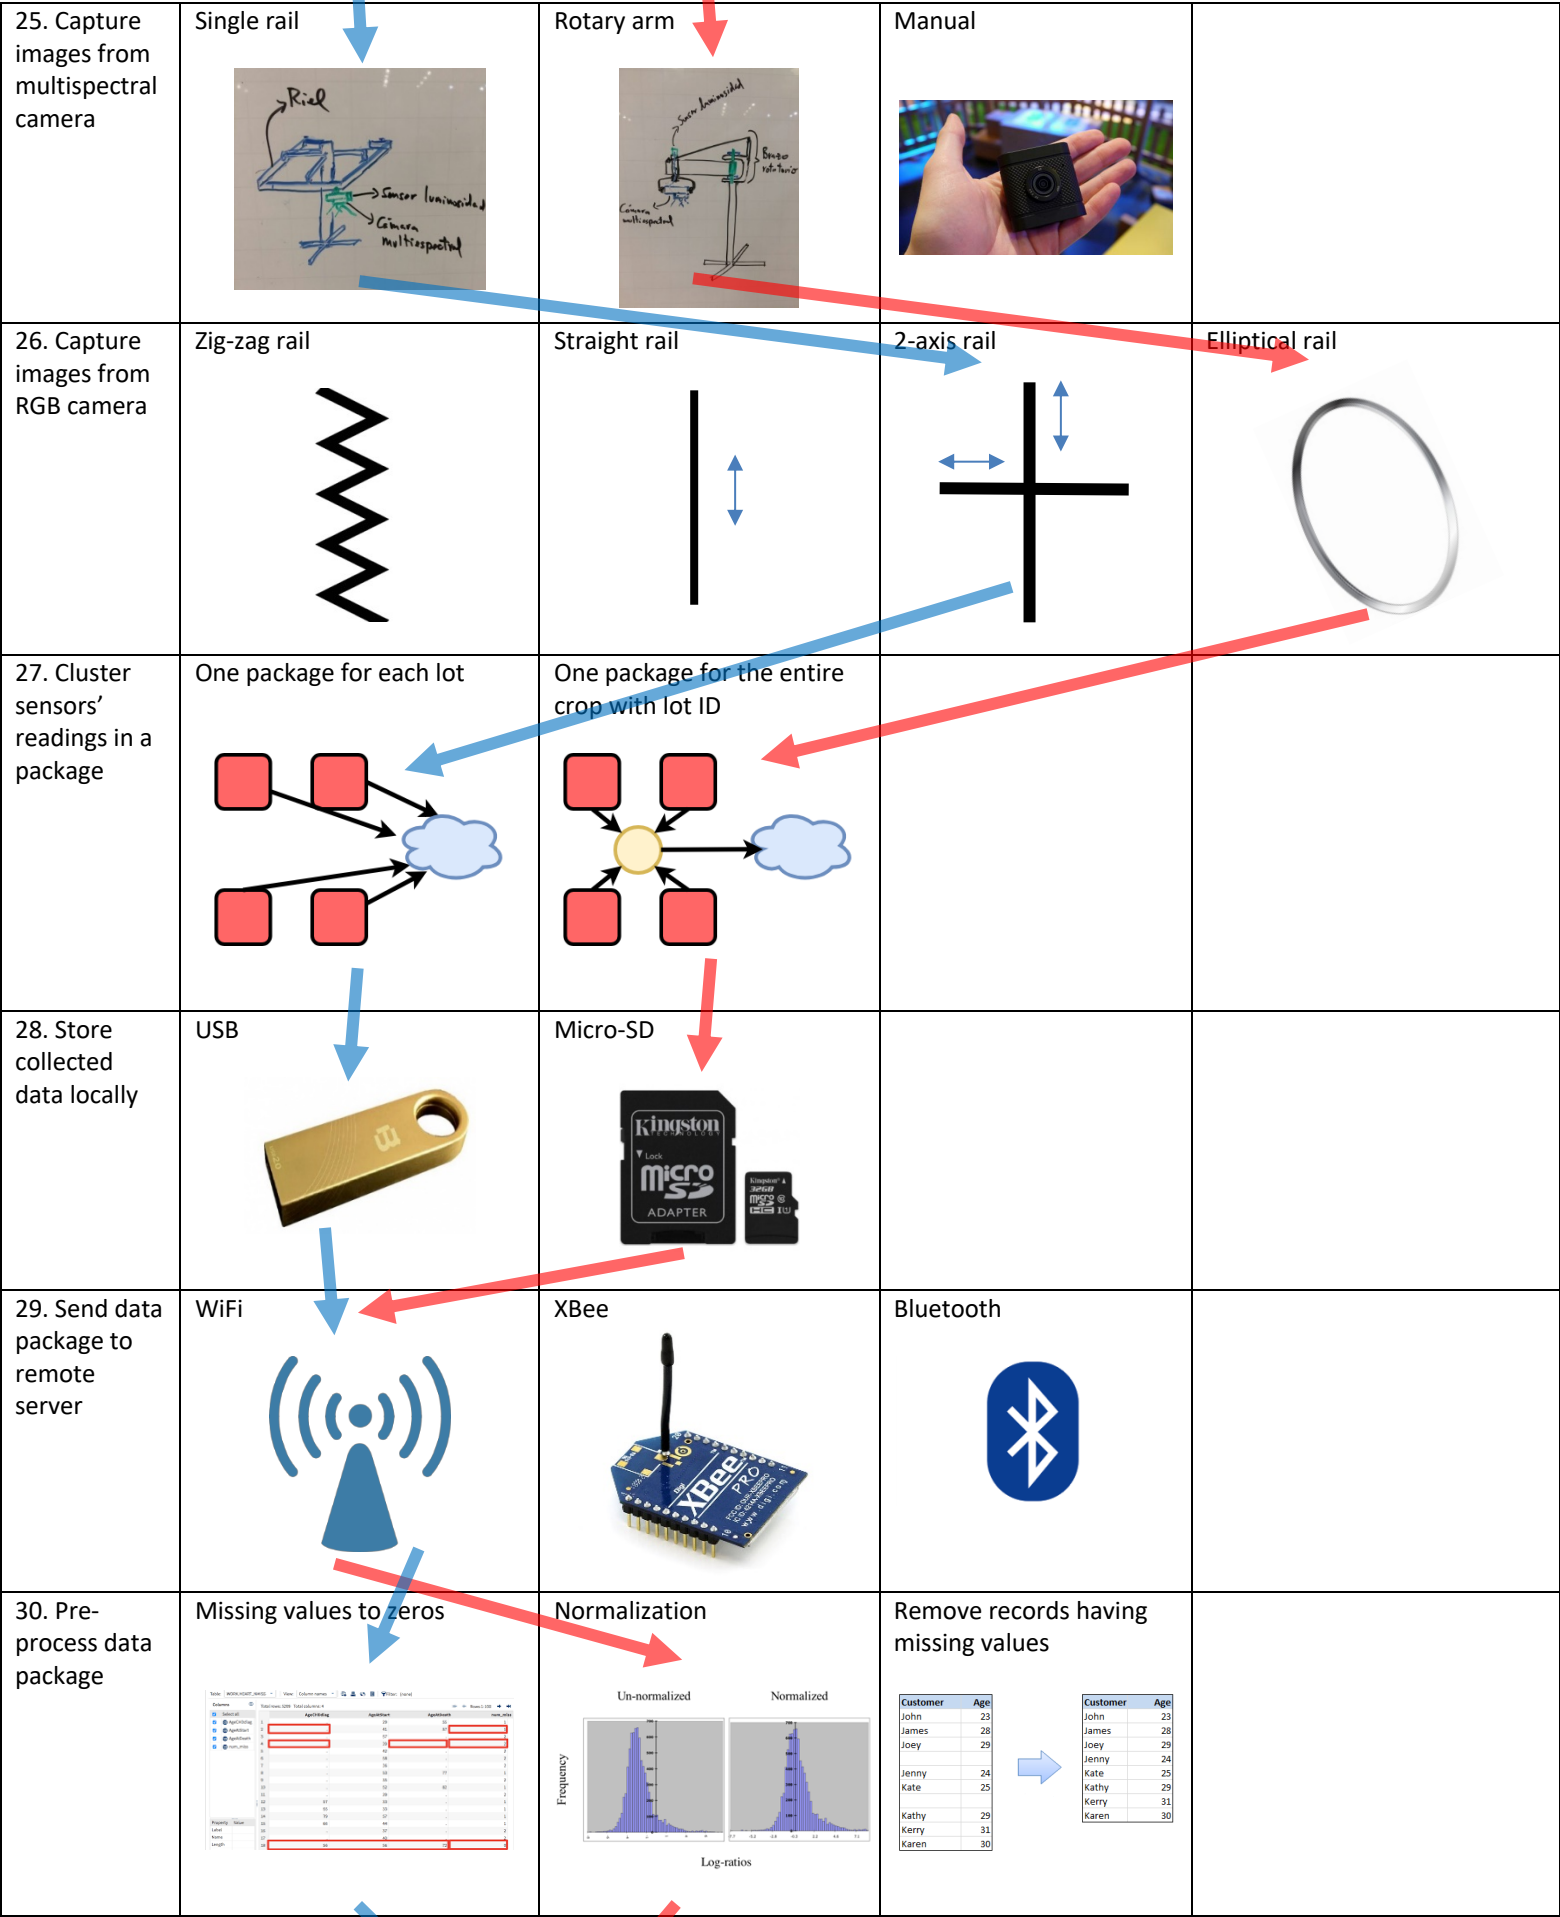

|                                                                           |                                                                                                             |                                                                                                                                      |                                                                                                     |                                                                                                          |
|---------------------------------------------------------------------------|-------------------------------------------------------------------------------------------------------------|--------------------------------------------------------------------------------------------------------------------------------------|-----------------------------------------------------------------------------------------------------|----------------------------------------------------------------------------------------------------------|
| 31. Store pre-processed data package                                      | Remote database            | Local database on the remote server                 |                                                                                                     |                                                                                                          |
| 32. Divide data into training, validation and test sets                   | Random division            | Balance across classes + Shuffle                    |                                                                                                     |                                                                                                          |
| 33. Process training dataset                                              | Deep Neural Network        | Support Vector Machines                             | Random forest     | Clustering           |
| 34. Evaluate the candidate model with the validation dataset              | Hinge-loss               | Cross-entropy                                     | Mean-Squared-Error $MSE = \frac{1}{n} \sum_{i=1}^n (y_i - \hat{y}_i)^2$                             |                                                                                                          |
| 35. Visualize the results through a simple interface using some test data | Develop a web interface  | Develop a software to automatically send e-mails  | Develop an app  | Use Thingworx PaaS  |

## References

- 1 – Proposal 1:** “Cultivemos café / Almacigo,” Quienes Somos, 15-Dec-2015. [Online]. Available: [https://www.cenicafe.org/es/index.php/cultivemos\\_cafe/almacigo/Almacigo](https://www.cenicafe.org/es/index.php/cultivemos_cafe/almacigo/Almacigo). [Accessed: 03-Feb-2019].
- 1 – Proposal 2:** Cultivo de platano - Anacafé. [Online]. Available: [https://www.anacafe.org/glifos/index.php/Varietades\\_de\\_cafe](https://www.anacafe.org/glifos/index.php/Varietades_de_cafe). [Accessed: 03-Feb-2019].
- 1 – Proposal 3:** “Coffee Plants of the World,” Specialty Coffee Association. [Online]. Available: <https://sca.coffee/research/coffee-plants-of-the-world/>. [Accessed: 03-Feb-2019].
- 1 – Proposal 4:** Ray, “Vacation Planning,” Costa Rica Guide. [Online]. Available: <https://costa-rica-guide.com/photos/coffee-growing-picking/>. [Accessed: 03-Feb-2019].
- 2 – Proposal 1:** Homepage. [Online]. Available: <https://www.gsdistribution.ca/hc-canada>. [Accessed: 03-Feb-2019].
- 2 – Proposal 2:** J. Poindexter, “Growing Potatoes: A Beginner's Guide to Planting Big & Healthy Potatoes,” MorningChores, 02-Nov-2018. [Online]. Available: <https://morningchores.com/growing-potatoes/>. [Accessed: 03-Feb-2019].
- 2 – Proposal 3:** “Raised Garden Beds,” USA Garden Company. [Online]. Available: <http://www.usagardencompany.com/raised-garden-beds.html>. [Accessed: 03-Feb-2019].
- 2 – Proposal 4:** “Pics for you every day,” King Yu of Xia Dynasty also known as Xia Yu Wikipedia t. [Online]. Available: <http://naturtreenspicerx.pw/Healthy-soil-healthy-plants-healthy-people-articles-Soil-carbon.html>. [Accessed: 03-Feb-2019].
- 3 – Proposal 1:** “Signum Fungicide 2.5kg,” ProGreen. [Online]. Available: <https://www.progreen.co.uk/signum-fungicide-2-5kg>. [Accessed: 03-Feb-2019].
- 3 – Proposal 2:** Prabha Polycolor Pvt Ltd. [Online]. Available: <http://kkmasterbatches.com/>. [Accessed: 03-Feb-2019].
- 3 – Proposal 3:** 2019. [Online]. Available: <https://www.homedepot.ca/en/home/p.defender-1l-ready-to-use-garden-fungicide.1000107206.html>. [Accessed: 04-Feb-2019].
- 4 – Proposal 1:** “Evolution Series,” Dream Pond. [Online]. Available: <https://www.dreampond.com/koi-pond-water-garden/water-pumps/evolution-series.html>. [Accessed: 04-Feb-2019].
- 4 – Proposal 2:** Web-Know-How, “Water Delivery selection guide,” ROVER & ROVER Battery Single Point Watering System. [Online]. Available: [http://www.aquapro.net/tank\\_info.html](http://www.aquapro.net/tank_info.html). [Accessed: 04-Feb-2019].
- 4 – Proposal 3:** “Canilla PVC para manguera manija mariposa Ø ½ DUKE- www.deplano.com.ar,” DePlano. [Online]. Available: <https://www.deplano.com.ar/canillas-pvc/2270-canilla-esf-pvc-mariposa-o-1-2-duke-60.html>. [Accessed: 04-Feb-2019].
- 5 – Proposal 1:** Buyers Products | Brands. [Online]. Available: <https://www.surpluscenter.com/Electrical/AC-Motors/>. [Accessed: 04-Feb-2019].
- 5 – Proposal 2:** “NEMA 23 Stepper Motor | 3A , 30kg-cm,” DIYElectronics. [Online]. Available: <https://www.diyelectronics.co.za/store/stepper-motors/478-nema-23-57bygh115-003.html>. [Accessed: 04-Feb-2019].
- 5 – Proposal 3:** “Hitec HS-645MG Servo Motor”, RobotShop, 2019. [Online]. Available: <https://www.robotshop.com/uk/hitec-hs-645mg-servo-motor.html>. [Accessed: 04-Feb-2019].
- 6 – Proposal 1:** “Coffee Plants of the World,” Specialty Coffee Association. [Online]. Available: <https://sca.coffee/research/coffee-plants-of-the-world/>. [Accessed: 04-Feb-2019].
- 6 – Proposal 2:** “100 litre Woven Planter Bags,” Nursery and Garden Supplies Australia. [Online]. Available: <https://nurseryandgardensupplies.com.au/product/woven-planter-bags-100-ltr/>. [Accessed: 04-Feb-2019].
- 6 – Proposal 3:** “How to Grow Plants in Raised Beds,” Thompson & Morgan. [Online]. Available: <https://www.thompson-morgan.com/how-to-grow-plants-in-raised-beds>. [Accessed: 04-Feb-2019].
- 7 – Proposal 1:** 2019. [Online]. Available: <https://www.homedepot.ca/en/home/p.defender-1l-ready-to-use-garden-fungicide.1000107206.html>. [Accessed: 04-Feb-2019].
- 7 – Proposal 2:** “Kingfisher Garden Pressure Sprayer 5L,” JTF. [Online]. Available: <https://www.jtf.com/sprayer-pressure-5-l.html>. [Accessed: 04-Feb-2019].
- 8 – Proposal 1:** Hydroponic Gardening & More with Brent, “PVC Watering System,” YouTube, 31-Dec-2015. [Online]. Available: <https://www.youtube.com/watch?v=AVWP7gjjka0>. [Accessed: 04-Feb-2019].
- 8 – Proposal 2:** M. Caffeine, “How To: Build A DIY Rain Machine For Under \$20!,” YouTube, 18-Apr-2014. [Online]. Available: [https://www.youtube.com/watch?v=XnHRB\\_P4F70](https://www.youtube.com/watch?v=XnHRB_P4F70). [Accessed: 04-Feb-2019].
- 8 – Proposal 3:** Dl.sciencesocieties.org, 2019. [Online]. Available: <https://dl.sciencesocieties.org/images/publications/jeq/35/6/2229fig2.jpeg>. [Accessed: 04-Feb-2019].
- 9 – Proposal 1:** “Travesses de fusta,” Fusta de serra. [Online]. Available: <https://www.fitorforestal.com/ca/travesses-de-fusta.html>. [Accessed: 04-Feb-2019].
- 9 – Proposal 2:** “MRC MERCANTILE,” MRC Mercantile Acrylic Plastics Cebu. [Online]. Available: <http://acrylicsheetcebu.com.ph/>. [Accessed: 04-Feb-2019].
- 9 – Proposal 3:** “He Made This Ugly Cinderblock Wall Beautiful With MORE Cinderblocks! - Page 2 of 2,” Pinterest. [Online]. Available: <https://co.pinterest.com/pin/163818505173203549/>. [Accessed: 04-Feb-2019].

**9 – Proposal 4:** "Chopping Boards & Racks", Busy Chef, 2019. [Online]. Available: [https://www.busychef.co.uk/collections/chopping-boards-racks/products/collection\\_tablecraft-cutting-board](https://www.busychef.co.uk/collections/chopping-boards-racks/products/collection_tablecraft-cutting-board). [Accessed: 04- Feb- 2019].

**10 – Proposal 1:** "Field Inoculation and Classification of Maize Ear Rot Caused by *Fusarium verticillioides* ", Bradford Protein Assay - BIO-PROTOCOL. [Online]. Available: <https://bio-protocol.org/e3099>. [Accessed: 04-Feb-2019].

**10 – Proposal 2:** Inspiring.vector.gmail.com, "diente de león blanco," Depositphotos. [Online]. Available: <https://mx.depositphotos.com/111413150/stock-illustration-dandelion-on-white.html>. [Accessed: 04-Feb-2019].

**10 – Proposal 3:** "Cómo limpiar las plantas," MiaRevista.es. [Online]. Available: <https://www.miarevista.es/hogar/articulo/como-limpiar-las-plantas-481444999448>. [Accessed: 04-Feb-2019].

**10 – Proposal 4:** "5 tuti tipp, hogy tisztán tartsd a szobanövényeidet," Gardenista, 03-Mar-2018. [Online]. Available: <https://gardenista.hu/2018/03/04/5-tut-tipp-hogy-tisztan-tartsd-a-szobanovenyeidet/>. [Accessed: 04-Feb-2019].

**12 – Proposal 1:** "What is the difference between sprinkler irrigation and furrow irrigation?", Quora, 2019. [Online]. Available: <https://www.quora.com/What-is-the-difference-between-sprinkler-irrigation-and-furrow-irrigation>. [Accessed: 04- Feb- 2019].

**12 – Proposal 2:** 2019. [Online]. Available: <https://www.homedepot.ca/en/home/p.defender-1l-ready-to-use-garden-fungicide.1000107206.html>. [Accessed: 04- Feb- 2019].

**12 – Proposal 3:** "Kingfisher Garden Pressure Sprayer 5L," JTF. [Online]. Available: <https://www.jtf.com/sprayer-pressure-5-l.html>. [Accessed: 04-Feb-2019].

**12 – Proposal 4:** Daisy Creek Farms with Jag Singh, "Drill Holes in 1/2' PVC Pipe and This Happens," YouTube, 08-May-2018. [Online]. Available: <https://www.youtube.com/watch?v=hazWfD45wNM>. [Accessed: 04-Feb-2019].

**13 – Proposal 1:** "Wind Speed and Direction Sensor | Dust Sentry & AQM 65," Aeroqual. [Online]. Available: <https://www.aeroqual.com/product/gill-wind-sensor>. [Accessed: 04-Feb-2019].

**13 – Proposal 2:** "Wind Speed/Direction, Modbus, 10 m Cable - IC-WSD-1-002," Instrument Choice. [Online]. Available: <https://www.instrumentchoice.com.au/instrument-choice/weather-stations/proffesional-weather-stations/dyacon-weather-station-accessories-and-sensors/wind-speed-direction-modbus-10-m-cable-ic-wsd-1-002>. [Accessed: 04-Feb-2019].

**13 – Proposal 3:** T. Twmffat and Instructables, "Arduino GPRS Weather Station - Part 2: Upgraded Wind Sensors and Improved Energy Efficiency," Instructables.com, 20-Jan-2019. [Online]. Available: <https://www.instructables.com/id/Arduino-GPRS-Weather-Station-Part-2-Upgraded-Wind-/>. [Accessed: 04-Feb-2019].

**14 – Proposal 1:** "water flow meter liquid flowmeter rotameter meter flow 94mm-in Flow Meters from Tools on Aliexpress.com | Alibaba Group," aliexpress.com. [Online]. Available: <https://www.aliexpress.com/item/water-flow-meter-liquid-flowmeter-rotameter-meter-flow-94mm/32373639290.html>. [Accessed: 04-Feb-2019].

**14 – Proposal 2:** "Pluviometer," Weer en klimaat. [Online]. Available: <https://weerkenklimaat.weebly.com/pluviometer.html>. [Accessed: 04-Feb-2019].

**14 – Proposal 3:** "Electro Magnetic Water Meter," IndiaMART.com. [Online]. Available: <https://www.indiamart.com/proddetail/electro-magnetic-water-meter-17008786755.html>. [Accessed: 04-Feb-2019].

**15 – Proposal 1:** "NEMA 23 Stepper Motor | 3A , 30kg-cm," DIYElectronics. [Online]. Available: <https://www.diyelectronics.co.za/store/stepper-motors/478-nema-23-57bygh115-003.html>. [Accessed: 04-Feb-2019].

**15 – Proposal 2:** "Hitec HS-645MG Servo Motor", RobotShop, 2019. [Online]. Available: <https://www.robotshop.com/uk/hitec-hs-645mg-servo-motor.html>. [Accessed: 04- Feb- 2019].

**15 – Proposal 3:** Micrologia, "con una sola mano tirando la cuerda sobre fondo blanco," Depositphotos. [Online]. Available: <https://mx.depositphotos.com/27740207/stock-photo-single-hand-pulling-rope-on.html>. [Accessed: 04-Feb-2019].

**16 – Proposal 1:** Ltd, "Dişli Zincir Dişli Zincir / Urunlerimiz / Zincir Kizaklari," Dişli Zincir / Türkiye. [Online]. Available: <http://www.dislizincir.com.tr/Urunlerimiz/Zincir-Kizaklari>. [Accessed: 04-Feb-2019].

**16 – Proposal 2:** D. Carpenter, "Curved Linear Rail," Ballscrews | 16mm & Below For Industrial Applications. [Online]. Available: <https://www.tpa-us.com/curved-linear-rail.html>. [Accessed: 04-Feb-2019].

**16 – Proposal 3:** "Konmison Sfu1605 Linear Guide Rail 400mm Linear Motion Rail Cnc Linear Rail Shaft Guide with Stepper Motor Nema 23 Support," Dorling Kindersley Science Encyclopedia: Amazon.co.uk: Dorling Kindersley Publishing: 9780751356410: Books. [Online]. Available: <https://www.amazon.co.uk/Konmison-Sfu1605-Linear-Stepper-Support/dp/B016MC2W3C>. [Accessed: 04-Feb-2019].

**16 – Proposal 4:** J. Petersen and L. Myers, "Wooden Train Freight Cars -- The Play Trains! Ultimate Wooden Train Guide," Play Trains!, 09-Dec-2017. [Online]. Available: <https://play-trains.com/wooden-train-freight-cars-with-removable-freight/>. [Accessed: 04-Feb-2019].

**17 – Proposal 1:** "Online Home Store for Furniture, Decor, Outdoors & More," Wayfair. [Online]. Available: <https://www.wayfair.com/bed-bath/pdx/ben-and-jonah-clean-home-peva-single-shower-curtain-liner-banj1011.html>. [Accessed: 04-Feb-2019].

**17 – Proposal 2:** Pam, Kristin, Toni, Hannah, Claire, C. Drake, and Denise, "DIY No-Sew Drop Cloth Curtains a CHEAP DIY Curtain Rod," The Crazy Craft Lady, 11-Jan-2019. [Online]. Available: <https://thecrazycraftlady.com/no-sew-drop-cloth-curtains/>. [Accessed: 04-Feb-2019].

**17 – Proposal 3:** "project," Variegateinteriors FALSE CEILING AND WINDOW BLINDS. [Online]. Available: <http://www.variegateinteriors.com/false-ceiling-and-window-blinds>. [Accessed: 04-Feb-2019].



**19 – Proposal 1:** D. Anthony, “Top 5: Best Drones for Real Estate Photography - MyDroneChoice,” My Drone Choice, 11-Jun-2017. [Online]. Available: <https://www.mydronechoice.com/best-drones-real-estate-photography/>. [Accessed: 04-Feb-2019].

**19 – Proposal 2:** J. Erickson, “Parasitic fungi and the battle against coffee rust disease,” University of Michigan News, 13-Nov-2015. [Online]. Available: <https://news.umich.edu/parasitic-fungi-and-the-battle-against-coffee-rust-disease/>. [Accessed: 04-Feb-2019].

**20 – Proposal 1:** “How To Install pH Sensors,” [www.wateronline.com](http://www.wateronline.com). [Online]. Available: <https://www.wateronline.com/doc/how-to-install-ph-sensors-0001>. [Accessed: 04-Feb-2019].

**20 – Proposal 2:** Turf-Tec Soil Compaction Tester / Dial Penetrometer. [Online]. Available: <http://www.turf-tec.com/PHDS1lit.html>. [Accessed: 04-Feb-2019].

**20 – Proposal 3:** “Measure Your Gut Health With a Stool pH Test,” Wellness Expert Specializing in Digestion & Joint Health. [Online]. Available: <https://www.drdauidwilliams.com/measure-gut-health-with-stool-ph-test>. [Accessed: 04-Feb-2019].

**21 – Proposal 1:** “Terms & Conditions,” Skye Instruments. [Online]. Available: <http://www.skyeinstruments.com/news-events/lux-sensors/>. [Accessed: 04-Feb-2019].

**21 – Proposal 2:** Zen Cart™ Team, “TSL2561 digital luminosity / lux / light sensor,” SK Pang Electronics Ltd. [Online]. Available: <http://skpang.co.uk/catalog/tsl2561-digital-luminosity-lux-light-sensor-p-1131.html>. [Accessed: 04-Feb-2019].

**21 – Proposal 3:** “Diode House +918030007370”, Diode House +918030007370, 2019. [Online]. Available: <http://diodehouse.in/ldr-light-dependent-resistor-sensor-ldr/p104>. [Accessed: 04-Feb-2019].

**22 – Proposal 1:** “DFROBOT Gravity: Analog Capacitive Soil Moisture Sensor- Corrosion Resistant,” Amazon. [Online]. Available: <https://www.amazon.com/DFROBOT-Gravity-Capacitive-Corrosion-Resistant/dp/B01GHY0N4K>. [Accessed: 04-Feb-2019].

**22 – Proposal 2:** R. Team, “DHT11 Temperature - Humidity Sensor Module : rhydoLABZ INDIA,” rhydoLABZ.com. [Online]. Available: [https://www.rhydolabz.com/sensors-weather-sensors-c-137\\_147/dht11-temperature-humidity-sensor-module-p-2044.html](https://www.rhydolabz.com/sensors-weather-sensors-c-137_147/dht11-temperature-humidity-sensor-module-p-2044.html). [Accessed: 04-Feb-2019].

**22 – Proposal 3:** “NEW PRODUCT – Soil Temperature/Moisture Sensor – SHT10,” Adafruit Industries - Makers, hackers, artists, designers and engineers!, 14-Mar-2013. [Online]. Available: <https://blog.adafruit.com/2013/03/14/new-product-soil-temperaturemoisture-sensor-sht10/>. [Accessed: 04-Feb-2019].

**22 – Proposal 4:** Soil Sensors. [Online]. Available: <http://www.eagle-tek.com/en/category/products/f>. [Accessed: 04-Feb-2019].

R. Team, “DHT11 Temperature - Humidity Sensor Module : rhydoLABZ INDIA,” rhydoLABZ.com. [Online]. Available: [https://www.rhydolabz.com/sensors-weather-sensors-c-137\\_147/dht11-temperature-humidity-sensor-module-p-2044.html](https://www.rhydolabz.com/sensors-weather-sensors-c-137_147/dht11-temperature-humidity-sensor-module-p-2044.html). [Accessed: 04-Feb-2019].

**23 – Proposal 1:** J. Shama, J. Shama, Forum News Service, and Forum News Service, “Tracking soil temperature an important step before planting,...”, Agweek, 21-Nov-2017. [Online]. Available: <http://www.agweek.com/news/4254715-tracking-soil-temperature-important-step-planting-experts-say>. [Accessed: 04-Feb-2019].

**23 – Proposal 2:** violetsupply.com. [Online]. Available: <https://www.violetsupply.com/product/thermometer-humidity-gauge/>. [Accessed: 04-Feb-2019].

**23 – Proposal 3:** R. Team, “DHT11 Temperature - Humidity Sensor Module : rhydoLABZ INDIA,” rhydoLABZ.com. [Online]. Available: [https://www.rhydolabz.com/sensors-weather-sensors-c-137\\_147/dht11-temperature-humidity-sensor-module-p-2044.html](https://www.rhydolabz.com/sensors-weather-sensors-c-137_147/dht11-temperature-humidity-sensor-module-p-2044.html). [Accessed: 04-Feb-2019].

**23 – Proposal 4:** Soil Sensors. [Online]. Available: <http://www.eagle-tek.com/en/category/products/f>. [Accessed: 04-Feb-2019].

R. Team, “DHT11 Temperature - Humidity Sensor Module : rhydoLABZ INDIA,” rhydoLABZ.com. [Online]. Available: [https://www.rhydolabz.com/sensors-weather-sensors-c-137\\_147/dht11-temperature-humidity-sensor-module-p-2044.html](https://www.rhydolabz.com/sensors-weather-sensors-c-137_147/dht11-temperature-humidity-sensor-module-p-2044.html). [Accessed: 04-Feb-2019].

**24 – Proposal 1:** “Gravity: Analog Electrical Conductivity Sensor / Meter(K=10),” DFRobot. [Online]. Available: <https://www.dfrobot.com/product-1797.html>. [Accessed: 04-Feb-2019].

**24 – Proposal 2:** Soil Sensors. [Online]. Available: <http://www.eagle-tek.com/en/category/products/f>. [Accessed: 04-Feb-2019].

**25 – Proposal 3:** T. Online, “The new 4GEE Capture Cam means you won't miss a thing,” T3, 01-Mar-2016. [Online]. Available: <https://www.t3.com/news/the-new-4gee-capture-cam-means-you-wont-miss-a-thing>. [Accessed: 04-Feb-2019].

**26 – Proposal 4:** “Steel metal ellipse frame border vector image on VectorStock,” VectorStock. [Online]. Available: <https://www.vectorstock.com/royalty-free-vector/steel-metal-ellipse-frame-border-vector-3509355>. [Accessed: 04-Feb-2019].

**28 – Proposal 1:** Compugold. [Online]. Available: [http://www.plaza-tecnologia.com/mxProductDetails.php?id\\_product=105688](http://www.plaza-tecnologia.com/mxProductDetails.php?id_product=105688). [Accessed: 04-Feb-2019].

**28 – Proposal 2:** “Kingston Digital 16GB microSDHC Class 10 UHS-I 45MB/s Read Card with SD Adapter (SDC10G2/16GB),” Amazon. [Online]. Available: <https://www.amazon.com/Kingston-Digital-16GB-microSDHC-SDC10G2/dp/B0162YQEIE>. [Accessed: 04-Feb-2019].

**29 – Proposal 1:** “Wireless Access Point PNG icons,” Free PNG and Icons Downloads. [Online]. Available: <https://www.iconspng.com/image/9945/wireless-access-point>. [Accessed: 04-Feb-2019].

**29 – Proposal 2:** ADXL345 - ADXL345 triple axis, digital accelerometer libr... | Mbed. [Online]. Available: <https://os.mbed.com/cookbook/Xbee-Pro>. [Accessed: 04-Feb-2019].

**29 – Proposal 3:** “Bluetooth Logo,” 1000 Logos The Famous Brands and Company Logos in the World. [Online]. Available: <http://1000logos.net/bluetooth-logo/>. [Accessed: 04-Feb-2019].

**30 – Proposal 1:** “How to Deal With Missing Values in SAS,” SASCRUNCH TRAINING. [Online]. Available: <https://www.sascrunch.com/dealing-with-missing-values.html>. [Accessed: 04-Feb-2019].

**30 – Proposal 2:** “PUMAdb : Normalization Help,” Princeton University. [Online]. Available: [https://puma.princeton.edu/help/results\\_normalization.shtml](https://puma.princeton.edu/help/results_normalization.shtml). [Accessed: 04-Feb-2019].

**30 – Proposal 3:** “Delete Blank Rows in Excel, Remove Blank Cells in Excel,” Chandoo.org - Learn Excel, Power BI & Charting Online, 25-Jan-2010. [Online]. Available: <https://chandoo.org/wp/delete-blank-rows-excel/>. [Accessed: 04-Feb-2019].

**31 – Proposal 1:** “Network data server 3d cloud computing concept realistic vector illustration,” City Of Forks City Limit Sign - FORKS / WASHINGTON. APRIL 13, 2017 Stock Footage Video 28374238 | Shutterstock, 04-Dec-2014. [Online]. Available: <https://www.shutterstock.com/image-vector/network-data-server-3d-cloud-computing-235210087>. [Accessed: 04-Feb-2019].

**31 – Proposal 2:** “Production line quality control management software - SCS Concept”, SCS Concept, 2019. [Online]. Available: <http://www.scsconcept.com/production-line-quality-control-management-software/>. [Accessed: 04- Feb- 2019].

**32 – Proposal 1:** 2019. [Online]. Available: <https://am207.github.io/2017/wiki/validation.html>. [Accessed: 04- Feb- 2019].

**33 – Proposal 1:** CS231n Convolutional Neural Networks for Visual Recognition. [Online]. Available: <http://cs231n.github.io/neural-networks-1/>. [Accessed: 04-Feb-2019].

**33 – Proposal 2:** Mindmajix, “Learn How Support Vector Machine Algorithm Works With Examples,” Mindmajix, 11-Nov-2017. [Online]. Available: <https://mindmajix.com/support-vector-machine-algorithm>. [Accessed: 04-Feb-2019].

**33 – Proposal 3:** “How Random Forests Can Keep You From Decision Tree,” Sefik Ilkin Serengil, 12-Mar-2018. [Online]. Available: <https://sefiks.com/2017/11/19/how-random-forests-can-keep-you-from-decision-tree/>. [Accessed: 04-Feb-2019].

**33 – Proposal 4:** Kassambara, “CLARA - Clustering Large Applications,” Correlation matrix : A quick start guide to analyze, format and visualize a correlation matrix using R software - Easy Guides - Wiki - STHDA, 09-Apr-2017. [Online]. Available: <http://www.sthda.com/english/articles/tag/pam-clustering/>. [Accessed: 04-Feb-2019].

**34 – Proposal 1:** “Hinge loss,” Wikipedia, 15-Jan-2019. [Online]. Available: [https://en.wikipedia.org/wiki/Hinge\\_loss](https://en.wikipedia.org/wiki/Hinge_loss). [Accessed: 04-Feb-2019].

**34 – Proposal 2:** S. Singla and S. Singla, “Experiments with a New Loss Term Added to the Standard Cross entropy,” medium.com, 09-Sep-2017. [Online]. Available: <https://medium.com/mlreview/experiments-with-a-new-loss-term-added-to-the-standard-cross-entropy-85b080c42446>. [Accessed: 04-Feb-2019].

**34 – Proposal 3:** MosheWorld, “MosheWorld/Machine-Learning,” GitHub. [Online]. Available: <https://github.com/MosheWorld/Machine-Learning>. [Accessed: 04-Feb-2019].

**35 – Proposal 1:** Sinteza Agro - WHY NOT?[Online]. Available: [https://whynot.com.ua/en/portfolio/branding/sinteza\\_agro/](https://whynot.com.ua/en/portfolio/branding/sinteza_agro/). [Accessed: 04-Feb-2019].

**35 – Proposal 2:** “How to Setup Email Notification,” Geotab Blog. [Online]. Available: <https://www.geotab.com/video/setup-email-notification/>. [Accessed: 04-Feb-2019].

**35 – Proposal 3:** “How mobile apps are helping agriculture in achieving sustainable development?,” SourceTrace Systems, 26-Nov-2018. [Online]. Available: <http://www.sourcetrace.com/mobile-apps-for-agriculture/>. [Accessed: 04-Feb-2019].

**35 – Proposal 4:** “Developer Portal | Developer Portal : ThingWorx,” Brand. [Online]. Available: <https://developer.thingworx.com/>. [Accessed: 04-Feb-2019].
